# Supplementary material
Source: publisher figshare collection journal article supplement (https://gsajournals.figshare.com/ndownloader/files/25590881)
Supplement: Supplementary file 1 [file 25590881]

# Supplemental Figures


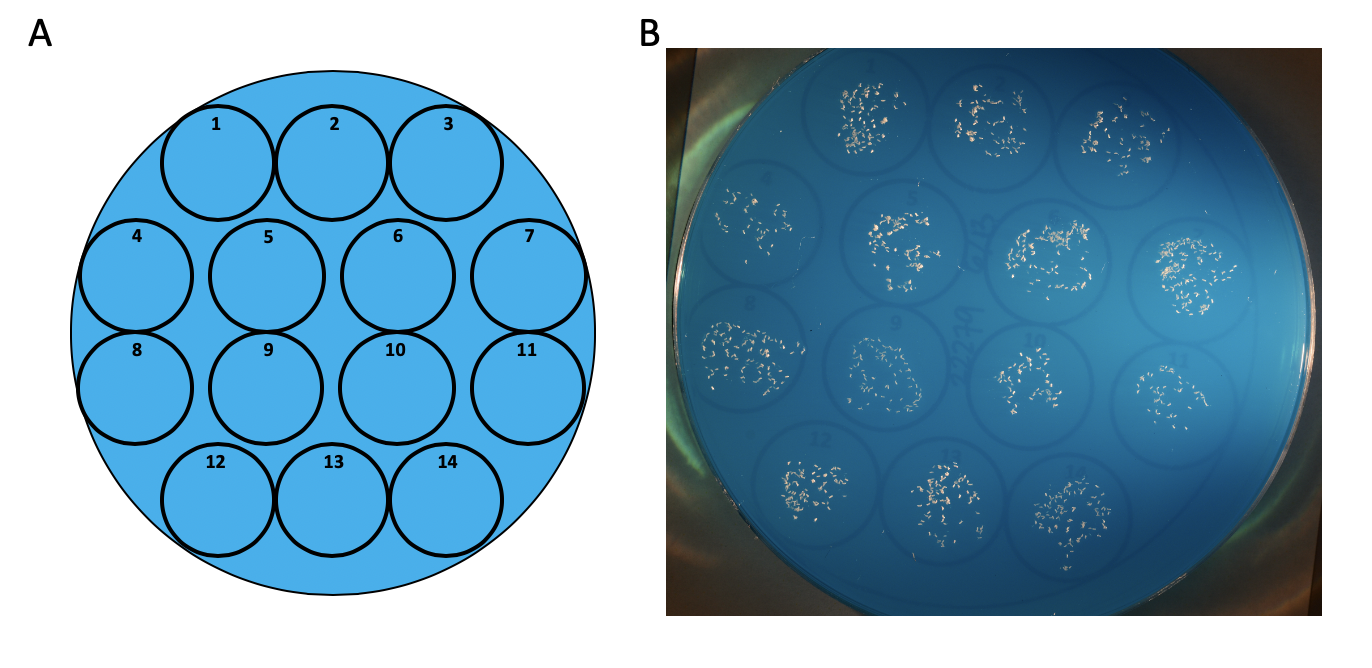


Figure S1. Embryo counting process. Embryos from each strain were arrayed on a 100mm petri dish containing 2% agar with dye for contrast. A. Template used for arraying embryos. B. An example of embryos arranged in each cell of the template. After taking a picture of each dish, embryos were transferred to vials containing water or 2mM CuSO4. All embryos from each cell on the template were transferred to one vial, resulting in up to 7 control vials and 7 copper vials per strain.


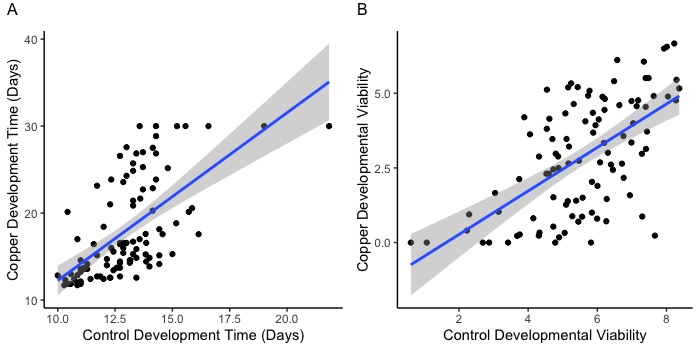


Figure S2. Developmental responses were correlated on control and copper media. A. Development time on control food was correlated development time on copper food (F(1,98) = 61.0, P < 0.0001, R2 = 38%). Vials in which no individuals emerged were given a value of 30 days. B Square root transformed developmental viability on control and 2mM CuSO4 was also correlated (F(1,98) = 57.1, P < 0.0001, R2 = 36%). Each point represents the strain mean response. Grey shading indicates the 95% CI of the regression.


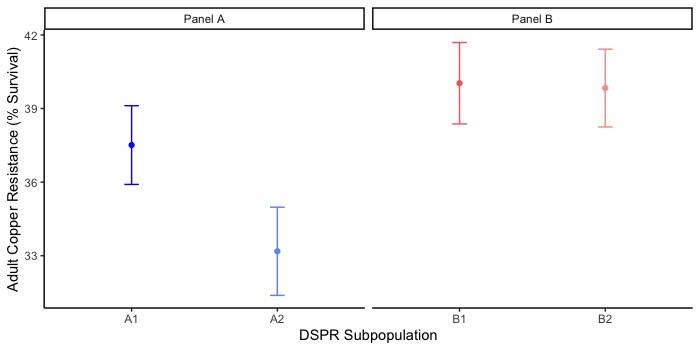


Figure S3. The effect of subpanel on adult copper resistance was panel-dependent. Mean (± 95% CI) female copper resistance per subpanel. Subpanel influenced percent survival in the A (F1,2289 = 12.64; p < 0.001) but not B panel (F1,2495 = 0.03; p = 0.86).


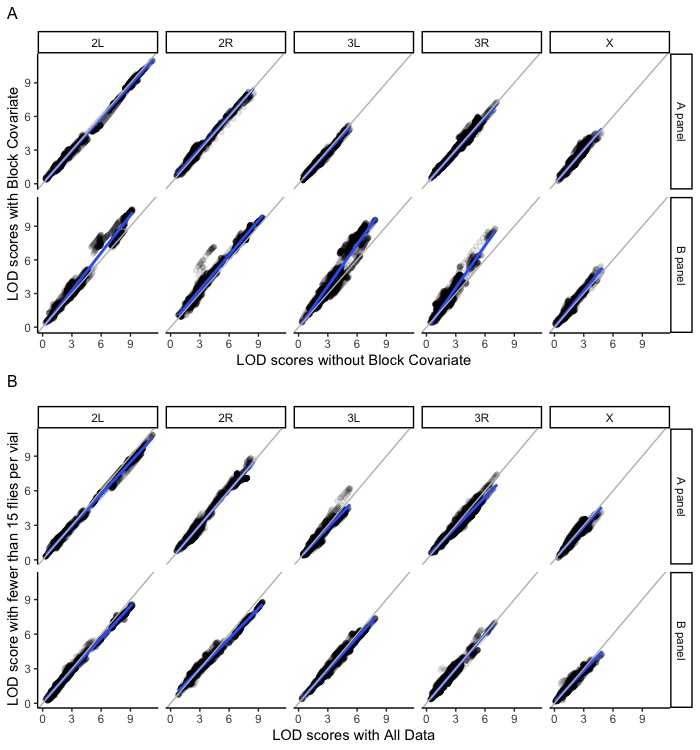


Figure S4. LOD scores were highly correlated between models. Comparison of LOD scores between a model with batch included as a covariate (A) and when vials with fewer than 15 flies were removed from the calculation of mean survival prior to mapping (B). Best fit lines are shown in blue in each plot; grey lines indicate the 1:1 line for comparison.


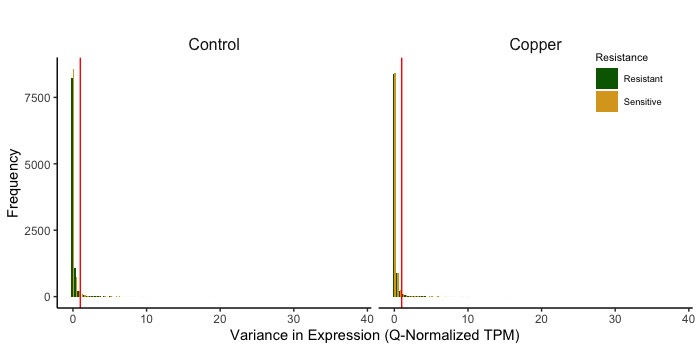


Figure S5. Variance in quantile-normalized TPM by within each sample group (resistant vs. sensitive) and treatment group (copper vs. control). The red vertical line indicates the cutoff of 1. All genes with a variance equal to or greater than 1 were excluded from all downstream analyses of DE gene from the three DE models.


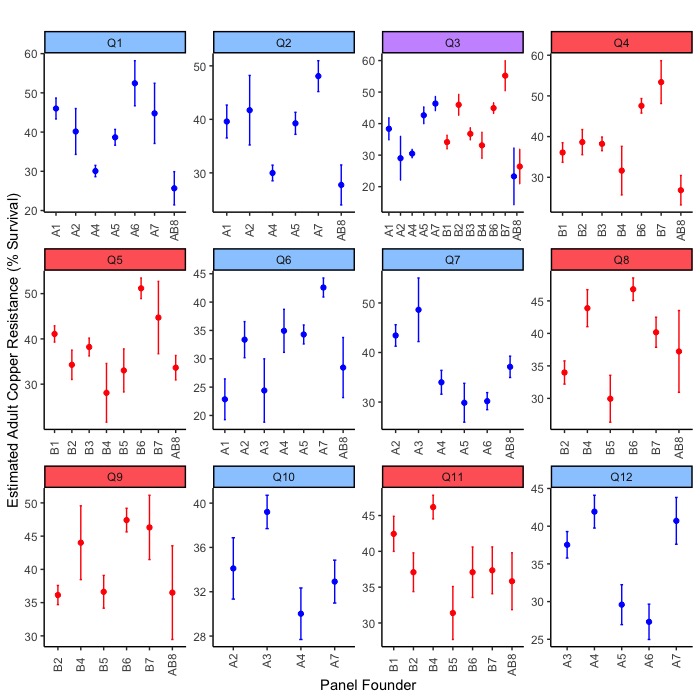


Figure S6. Estimated founder haplotype effects at each QTL associated with adult copper resistance. Data are presented as estimated founder means (±SE) when the founder haplotype was present in more than 7 DSPR strains. Plots are colored by panel; panel A is plotted in blue, panel B is plotted in red. Purple indicates the shared QTL (Q3) between the A and B panels.

*
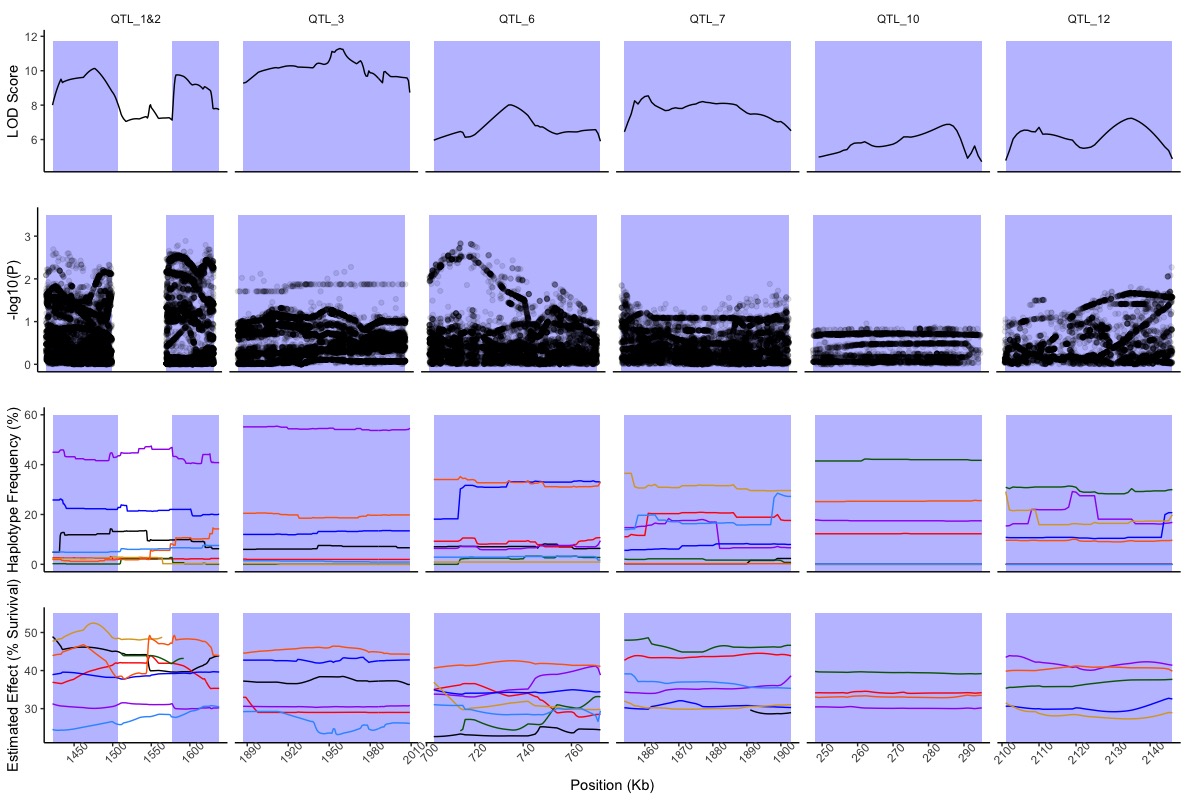
*

***Figure S7****. For QTL identified in the A panel, we report fine mapping, haplotype frequency, and estimated effects of founder haplotypes on adult copper survival for each marker position through the QTL interval. Haplotype-specific data is shown as colored lines (black = A1, red = A2, green = A3, purple = A4, dark blue = A5, gold = A6, orange = A7, light blue = AB8), and shaded boxes in each plot pane show the boundaries of each QTL. Incomplete lines reporting estimated effects reflect too few strains present with a particular founder haplotype to calculate the estimated effect. Fine mapping did not reveal any promising candidate genes. Haplotype frequency did not suggest that close proximity QTL (Q1 and Q2) were inappropriately separated due to a sudden shift in haplotype frequency.*

*
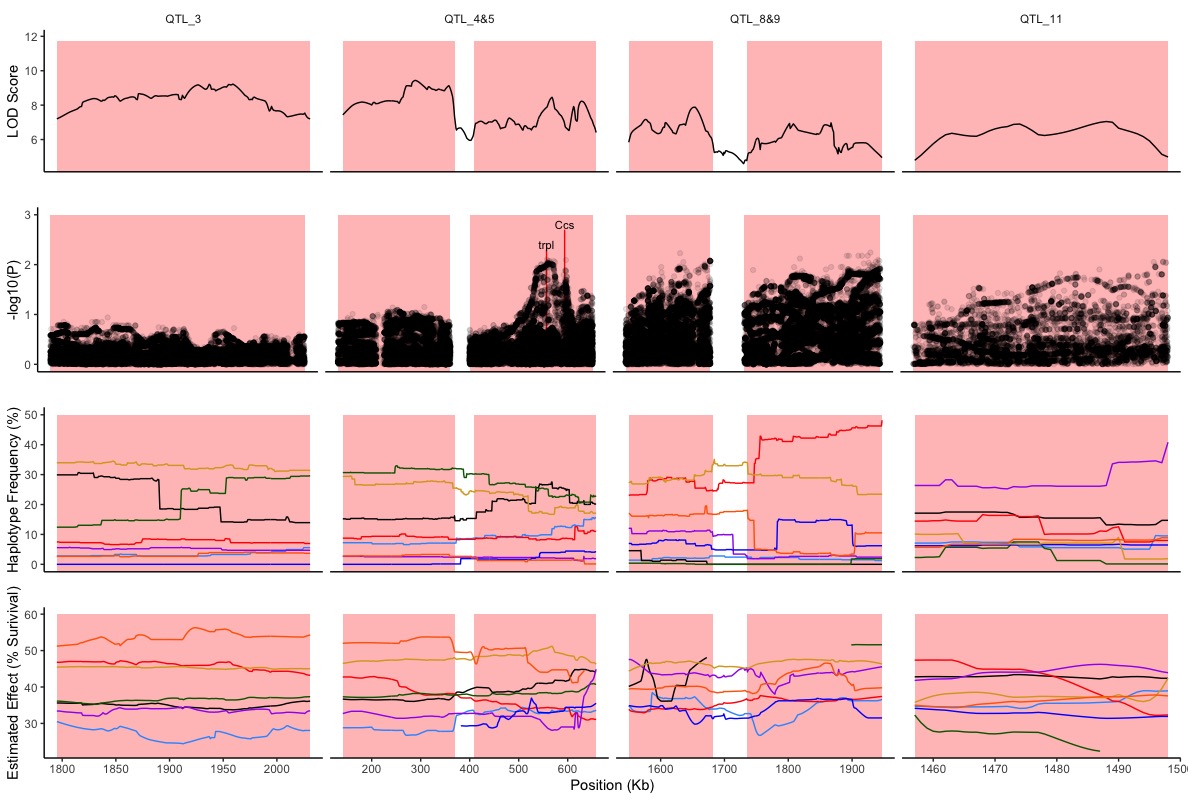
*

***Figure S8****. For QTL identified in the B panel, we report fine mapping, haplotype frequency, and estimated effects of founder haplotypes on adult copper survival for each marker position through the QTL interval. Haplotype-specific data is shown as colored lines (black = B1, red = B2, green = B3, purple = B4, dark blue = B5, gold = B6, orange = B7, light blue = AB8), and shaded boxes in each plot pane show the boundaries of each QTL. Incomplete lines reporting estimated effects reflect too few strains present with a particular founder haplotype to calculate the estimated effect. Fine mapping supported* Ccs *and* trpl *as promising candidate genes. Haplotype frequency did not suggest that close proximity QTL (Q4/Q5 and Q8/Q9) were inappropriately separated due to a sudden shift in haplotype frequency.*

*
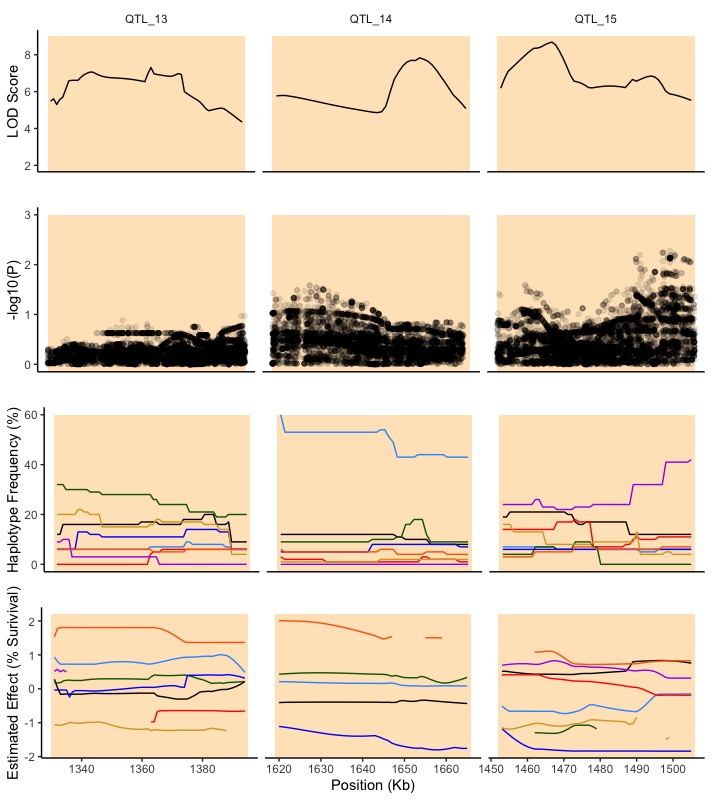
*

***Figure S9****. For QTL identified in the B panel associated with copper treatment-specific developmental viability, we report fine mapping, haplotype frequency, and estimated effects of founder haplotypes on adult copper survival for each marker position through the QTL interval. Haplotype-specific data is shown as colored lines (black = B1, red = B2, green = B3, purple = B4, dark blue = B5, gold = B6, orange = B7, light blue = AB8), and shaded boxes in each plot pane show the boundaries of each QTL. Incomplete lines reporting estimated effects reflect too few strains present with a particular founder haplotype to calculate the estimated effect. Fine mapping did not reveal any promising candidate genes.*


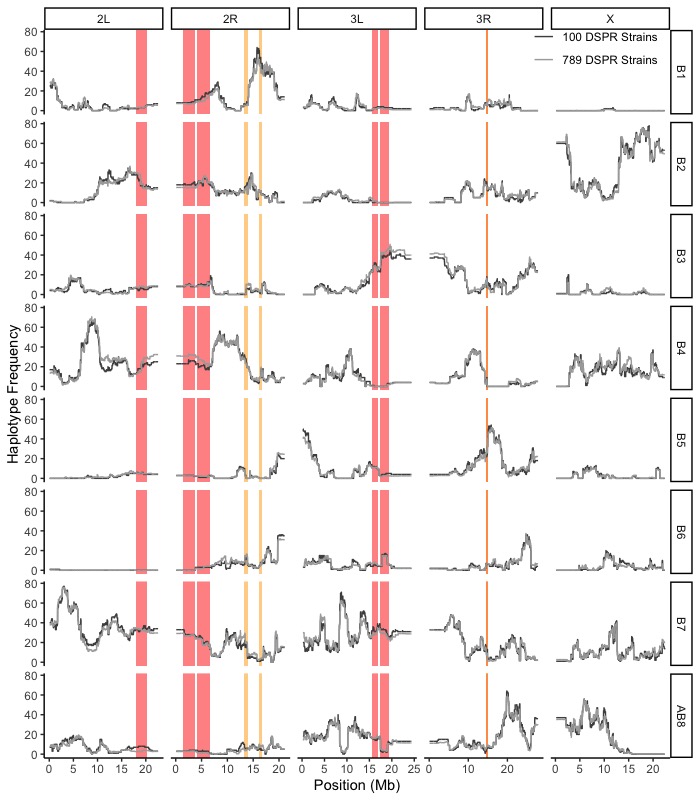


***Figure S10****. Founder haplotype representation was similar between the sample of strains used to measure adult and developmental traits in the B panel. Founder haplotype frequencies are shown at each marker position (every 10,000 bp) through the genome for the 789 DSPR strains sampled for the adult copper resistance phenotype (light grey) and the 100 DSPR strains sampled for the copper treatment-specific developmental viability phenotype (dark grey). Representation of founder haplotypes in the DSPR strains sampled for the developmental phenotype is similar to founder haplotype representation in the 789 strains sampled for the adult phenotype. In each panel, QTL intervals for adult copper resistance and treatment-specific developmental viability are shown as red and yellow bars, respectively. A panel QTL are not shown.*


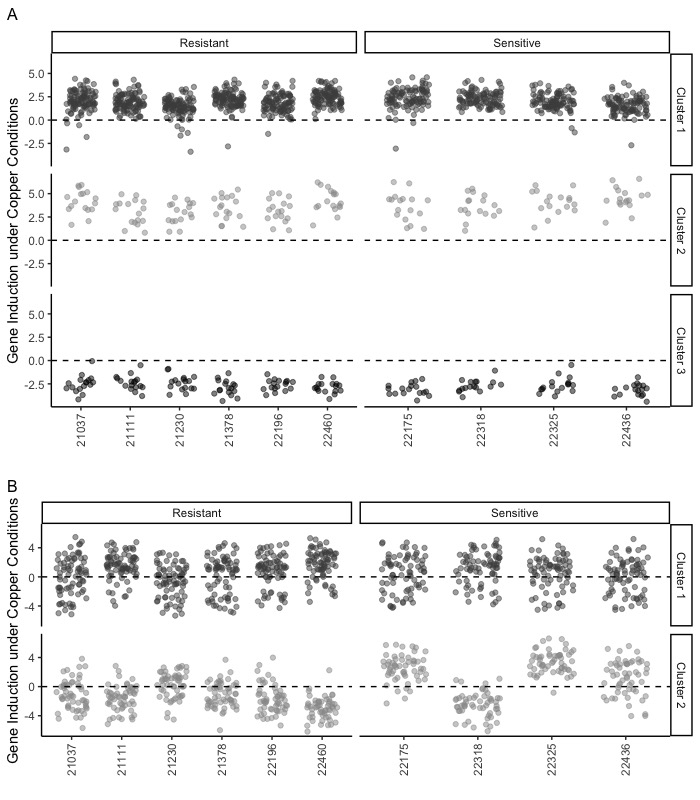


Figure S11. Clust analysis of genes influenced by treatment or resistance class. A. Clust identified 3 clusters from genes with DE due to treatment. 17 genes from cluster 1 were also implicated by adult copper resistance QTL; one gene was also implicated by copper treatment-specific developmental viability QTL Q15. From treatment clusters 2 and 3, 2 and 4 genes, respectively, were also implicated by adult copper resistance QTL. B. Clust identified 2 clusters from genes with DE due to resistance class. In cluster1, 11 genes were also implicated by adult copper resistance QTL; 4 genes from cluster 2 were also implicated by adult copper resistance QTL. One gene from cluster 2 was implicated by treatment-specific developmental viability QTL Q15 as well. Points are shaded to help distinguish clusters.

# Supplemental Tables

Table S1. Correlations between standards across each of plate and block were high and consistent.

|  | block1_P1 | block1_P2 | block1_P3 | block2_P1 | block2_P2 | block2_P3 | block3_P1 | block3_P2 | block3_P3 |
| --- | --- | --- | --- | --- | --- | --- | --- | --- | --- |
| block1_P1 | -- | 99.99 | 99.99 | 99.97 | 99.97 | 99.91 | 99.96 | 99.94 | 99.94 |
| block1_P2 |  | -- | 99.99 | 99.98 | 99.98 | 99.90 | 99.97 | 99.96 | 99.96 |
| block1_P3 |  |  | -- | 99.98 | 99.98 | 99.92 | 99.97 | 99.95 | 99.96 |
| block2_P1 |  |  |  | -- | 99.99 | 99.86 | 99.99 | 99.98 | 99.97 |
| block2_P2 |  |  |  |  | -- | 99.87 | 99.98 | 99.97 | 99.97 |
| block2_P3 |  |  |  |  |  | -- | 99.84 | 99.86 | 99.88 |
| block3_P1 |  |  |  |  |  |  | -- | 99.98 | 99.97 |
| block3_P2 |  |  |  |  |  |  |  | -- | 99.99 |
| block3_P3 |  |  |  |  |  |  |  |  | -- |

Table S2. Summary of analysis of variance and regressions.

| **A. Effect of DSPR strain on development time, control food** | | | | | |
| --- | --- | --- | --- | --- | --- |
| **Source** | **df** | **SS** | **MS** | **F value** | **P value** |
| DSPR Strain | 99 | 1573 | 15.89 | 31.61 | < 0.00001 |
| Residuals | 579 | 291.1 | 0.50 |  |  |
|  |  |  |  |  |  |
| **B. Effect of DSPR strain on developmental viability, control food** | | | | | |
| **Source** | **df** | **SS** | **MS** | **F value** | **P value** |
| DSPR Strain | 99 | 2046 | 20.66 | 11.77 | < 0.00001 |
| Residuals | 579 | 1016 | 1.75 |  |  |
|  |  |  |  |  |  |
| **C. Correlation between copper and control development time** | | | | | |
| **Source** | **df** | **SS** | **MS** | **F value** | **P value** |
| Treatment | 1 | 1214 | 1214 | 61.0 | < 0.00001 |
| Residuals | 98 | 1950 | 19.9 |  |  |
|  |  |  |  |  |  |
| **D. Correlation between copper and control developmental viability** | | | | | |
| **Source** | **df** | **SS** | **MS** | **F value** | **P value** |
| Treatment | 1 | 128.4 | 128.4 | 54.1 | < 0.00001 |
| Residuals | 98 | 232.8 | 2.38 |  |  |
|  |  |  |  |  |  |
| **E. Variation in adult copper resistance among DSPR Mapping Panel A** | | | | | |
| **Source** | **df** | **SS** | **MS** | **F value** | **P value** |
| Subpanel | 1 | 10621 | 10620.7 | 12.64 | < 0.001 |
| Batch | 5 | 38679 | 7735.8 | 9.20 | < 0.001 |
| Subpanel x Batch | 2 | 919 | 459.5 | 0.55 | 0.58 |
| Residuals | 2289 | 1923750 | 840.4 |  |  |
|  |  |  |  |  |  |
| **F. Variation in adult copper resistance among DSPR Mapping Panel B** | | | | | |
| **Source** | **df** | **SS** | **MS** | **F value** | **P value** |
| Subpanel | 1 | 25 | 24.5 | 0.03 | 0.86 |
| Batch | 5 | 30334 | 6066.7 | 7.18 | < 0.001 |
| Subpanel x Batch | 3 | 2774 | 924.6 | 1.09 | 0.35 |
| Residuals | 2495 | 2107619 | 844.7 |  |  |
|  |  |  |  |  |  |
| **G. Effect of copper on consumption in 95 DSPR strains** | | | | | |
| **Source** | **df** | **SS** | **MS** | **F value** | **P value** |
| DSPR Strain | 94 | 4.46e-5 | 4.70e-7 | 3.08 | < 0.00001 |
| Treatment | 1 | 3.55e-4 | 3.55e-4 | 2306 | < 0.00001 |
| DSPR Strain x Treatment | 94 | 4.01e-5 | 4.30e-7 | 2.77 | < 0.00001 |
| Residuals | 348 | 5.36e-5 | 1.5e-7 |  |  |
|  |  |  |  |  |  |
| **H. Effect of adult copper resistance on copper consumption** | | | | | |
| **Source** | **Estimate** | **SE** |  | **t value** | **P value** |
| Intercept | 1.80e-03 | 9.56e-05 |  | 18.83 | < 0.00001 |
| Adult Copper Survival | 1.76e-06 | 1.78e-06 |  | 0.992 | 0.32 |
|  |  |  |  |  |  |
| **I. Effect of adult copper resistance on control consumption** | | | | | |
| **Source** | **Estimate** | **SE** |  | **t value** | **P value** |
| Intercept | 56.78 | 4.56 |  | 12.46 | < 0.00001 |
| Adult Copper Survival | -48436.9 | 13602.5 |  | -3.56 | 0.001 |
|  |  |  |  |  |  |
| **J. Correlation between adult copper resistance and feeding plasticity** | | | | | |
| **Source** | **df** | **SS** | **MS** | **F value** | **P value** |
| Adult Copper resistance | 1 | 1.57e-6 | 1.57e-6 | 5.33 | 0.023 |
| Residuals | 93 | 2.74e-5 | 2.74e-5 |  |  |
|  |  |  |  |  |  |
| **K. Effect of copper on development time** | | | | | |
| **Source** | **df** | **SS** | **MS** | **F value** | **P value** |
| DSPR Strain | 99 | 15505 | 156.6 | 24.21 | < 0.00001 |
| Treatment | 1 | 8366 | 8366 | 1293 | < 0.00001 |
| DSPR Strain x Treatment | 99 | 7525 | 76.0 | 11.75 | < 0.00001 |
| Residuals | 1157 | 7485 | 6.5 |  |  |
|  |  |  |  |  |  |
| **L. Effect of copper on developmental viability** | | | | | |
| **Source** | **df** | **SS** | **MS** | **F value** | **P value** |
| DSPR Strain | 99 | 3169 | 32.01 | 49.17 | < 0.00001 |
| Treatment | 1 | 2543 | 2543 | 3905 | < 0.00001 |
| DSPR Strain x Treatment | 99 | 846.0 | 8.55 | 13.13 | < 0.00001 |
| Residuals | 1157 | 753.3 | 0.65 |  |  |
|  |  |  |  |  |  |
| **M. Correlation between treatment-specific development time and treatment-specific developmental viability** | | | | | |
| **Source** | **df** | **SS** | **MS** | **F value** | **P value** |
| Treatment-specific Development Time | 1 | 102.0 | 102.0 | 76.4 | < 0.00001 |
| Residuals | 98 | 130.8 | 1.34 |  |  |
|  |  |  |  |  |  |
| **N. Correlation between adult copper resistance and treatment-specific development time** | | | | | |
| **Source** | **Estimate** | **SE** |  | **t value** | **P value** |
| Intercept | 0.32 | 0.91 |  | 0.35 | 0.72 |
| Adult Copper Resistance | -0.0006 | 0.02 |  | -0.40 | 0.69 |
|  |  |  |  |  |  |
| **O. Correlation between adult copper resistance and treatment-specific developmental viability** | | | | | |
| **Source** | **Estimate** | **SE** |  | **t value** | **P value** |
| Intercept | -0.45 | 0.31 |  | -1.44 | 0.15 |
| Adult Copper Resistance | 0.009 | 0.006 |  | 1.65 | 0.10 |
|  |  |  |  |  |  |
| **P. Correlation between estimated haplotype effects** | | | | | |
| **Source** | **df** | **SS** | **MS** | **F value** | **P value** |
| Estimated Haplotype Effect | 1 | 3.41 | 3.41 | 7.11 | 0.04 |
| Residuals | 5 | 2.40 | 0.48 |  |  |

Table S3. RNAi stocks for candidate genes.

| **Gene** | **Stock ID** | **Association in This Study** | **Proposed Metal Association** | | **Driver** | **N** |
| --- | --- | --- | --- | --- | --- | --- |
| *trpl* | BDSC_26722 (VAL10) | Q5B, RNAseq | Mn (Gaudet et al. 2011) | | Ubiquitous | 17 |
| Midgut | 18 |
| *CG5235* | BDSC_27694 (VAL10) | Q8B, RNAseq | Cu (Gaudet et al. 2011) | | Ubiquitous | 18 |
| Midgut | 18 |
| BDSC_66964 (VAL20) | Ubiquitous | 11 |
| Midgut | 18 |
| *ZnT41F* | BDSC_65382 (VAL20) | Q4B | Zn (Lye et al. 2013) | | Ubiquitous | 11 |
| Midgut | 16 |
| BDSC_28638 (VAL10) | Ubiquitous | 17 |
| Midgut | 18 |
| *MtnC* | BDSC_53292 (VAL20) | RNAseq |  |  | Ubiquitous | NA |
| Cu, Zn, Cd (Egli et al. 2006a; Calap-Quintana et al. 2017) | | Midgut | 17 |
| BDSC_63008 (VAL20) | Ubiquitous | 12 |
| Midgut | 18 |
| *Catsup* | BDSC_55396 (VAL20) | Q3A | Zn (Lye et al. 2013) | | Ubiquitous | 4 |
| Midgut | 18 |
| *CG11825* | BDSC_58199 (VAL20) | Q5B | Cu (Norgate et al. 2007) | | Ubiquitous | 8 |
| Midgut | 17 |
| *Ccs* | BDSC_62919 (VAL20) | Q5B | Cu, Zn (Kirby et al. 2008; Gaudet et al. 2011) | | Ubiquitous | 12 |
| Midgut | 18 |
| *Sod1* | BDSC_34616 (VAL20) | NA | Cu, Zn (Gaudet et al. 2011) | | Ubiquitous | 17 |
| Midgut | 18 |
| *Sod2* | BDSC_32496 (VAL20) | Ubiquitous | 17 |
| Midgut | 18 |
| *whd* | BDSC_33635 (VAL20) | Q5B, RNAseq | Fe, Cd (Strub et al. 2008) | | Ubiquitous | 18 |
| Midgut | 18 |
| *DCP2* | BDSC_34806 (VAL20) | Q8B | Mn (Thurmond *et al.* 2019) | | Ubiquitous | 17 |
| Midgut | 18 |
| *CG10505* | BDSC_38317 (VAL20) | RNAseq | Cu, Zn, Cd (Yepiskoposyan *et al.* 2006; Thurmond *et al.* 2019) | | Ubiquitous | 16 |
| Midgut | 18 |
| *babo* | BDSC_40866 (VAL20) | Q5B | (Thurmond *et al.* 2019) | | Ubiquitous | 15 |
| Midgut | 18 |
| *swm* | BDSC_52935 (VAL20) | Q3B | (Thurmond *et al.* 2019) | | Ubiquitous | NA |
| Midgut | 13 |
| *Mvl* | BDSC_55316 (VAL20) | RNAseq | Fe, Cu, Mn, Cd (Southon et al. 2008; Bettedi et al. 2011) | | Ubiquitous | 14 |
| Midgut | 18 |
| *stl* | BDSC_57811 (VAL20) | Q7A, RNAseq | Zn (Ozdowski et al. 2009) | | Ubiquitous | 18 |
| Midgut | 18 |

Table S4. Genes mapped to regions associated with each QTL. Data from FlyBase release FB2020_01. Grey text indicates non-protein coding genes. Red text indicates genes that overlap between QTL intervals.

| *See additional file Supplemental Table 4* |
| --- |

Table S5. DE genes identified with the resistance class model (~ TRT + RES vs. reduced model: ~ TRT), treatment model (~ TRT + RES vs. reduced model: ~ RES), and the full model (~ TRT + RES vs reduced model: ~ 1). Gene position data is from FlyBase release FB2020_01.

| *See additional file Supplemental Table 5* |
| --- |

Table S6. GO terms and associated gene IDs identified for the DE genes from the full model (~ TRT + RES vs reduced model: ~ 1), treatment model (~ TRT + RES vs. reduced model: ~ RES), resistance model (~ TRT + RES vs. reduced model: ~ TRT), and the clusters formed for the treatment and resistance sets of DE genes. GO analysis was performed using FlyMine.

| *See additional file Supplemental Table 6* |
| --- |

# Supplemental Files

File S1. README file for datafiles accompanying this study.
